# Supplementary material for: Development of novel enzyme immobilization methods employing formaldehyde or triethoxysilylbutyraldehyde to fabricate immobilized enzyme microreactors for peptide mapping
Source: Royal Society of Chemistry journal article supplement (doi:10.1039/d2ay00840h), 2022-01-01
Supplement: d2ay00840h1.pdf [file d2ay00840h1.pdf]

**Title:** Development of Novel Enzyme Immobilization Methods Employing Formaldehyde or Triethoxysilylbutyraldehyde To Fabricate Immobilized Enzyme Microreactors For Peptide Mapping

**Authors:** Kenneth Ku, Connor Frey, Maor Arad, & Golfam Ghafourifar

### Supplementary Data

**Table S1** – Effects of using phosphate buffer vs phosphate buffered saline (PBS) on formation of FA-CT enzyme particle. Reactions were carried out for two hours at 21°C using 40 µL of 1.3 mM chymotrypsin and 78 µL of formaldehyde 37%. “Large” indicates an enzyme particle which is greater in size than 2 mm × 2 mm in terms of the width and height for the total size of the enzyme particle. “Small” refers to any enzyme particle which is less than 2mm × 2mm mm in terms of the width and height for the total size of the enzyme particle. “Robust” indicates the FA-CT enzyme particle formed without breaking apart during the washing procedure. “Poor” robustness refers to breakage of the enzyme particle during washing.

|                               | Buffer Conditions | Enzyme Particle Size | Enzyme Particle Robustness |
|-------------------------------|-------------------|----------------------|----------------------------|
| Phosphate Buffer              | 50 mM, pH 6.4     | Large                | Robust                     |
| Phosphate Buffer Saline (PBS) | 10 mM, pH 7.4     | Small                | Robust                     |

**Table S2** – Effects of various FA:CT ratios (mass:mass) on immobilization of 1.3 mg CT. Crosslinking reaction was performed for two hours at 21°C using 50 mM phosphate buffer (pH 6.4). “Large/Small” and “Robust/Poor” were defined same as Table 1.

| FA:CT ratio (mass:mass) | Enzyme Particle Size | Enzyme Particle Robustness |
|-------------------------|----------------------|----------------------------|
| 38.5:1.0                | Small                | Robust                     |
| 46.1:1.0                | Small                | Robust                     |
| 69.2:1.0                | Large                | Robust                     |
| 123.1:1.0               | Large                | Poor                       |

**Table S3** – Effects of reaction time on FA-CT immobilization. The reaction was carried out at 30 °C using a FA:CT ratio of 69.2:1.0 (mass:mass). CT was dissolved in 50 mM phosphate buffer (pH 6.4). Immobilized amount of CT was calculated to be 1.3 mg. “Large” and “Robust” were defined same as Table 1.

| Immobilization Time (Hours) | Enzyme Particle Size | Enzyme Particle Robustness |
|-----------------------------|----------------------|----------------------------|
| Two                         | Large                | Robust                     |
| Four                        | Large                | Robust                     |
| Seven                       | Large                | Poor                       |

**Table S4** – Effects of temperature on FA-CT immobilization performed for two hours using a ratio of FA:CT of 69.2:1.0 (mass:mass) with 1.3 mg CT in 50 mM phosphate buffer (pH 6.4). “Large” and “Robust” were defined same as Table 1.

| Immobilization Temperature (°C) | Enzyme Particle Size | Enzyme Particle Robustness |
|---------------------------------|----------------------|----------------------------|
| 0                               | Small                | Poor                       |
| 21                              | Small                | Poor                       |
| 30                              | Large                | Robust                     |
| 37                              | Large                | Robust                     |

K W V T F I S L L L L F S S A Y S R G V F R R D T H K S E I A H R F **K D L G E E** H F K G L V L I A F S Q Y L Q Q C P F D  
 E H V K L V N E L T E F A K T C V A D E S H A G C E K S L H T L F G D E L C K V A S L R E T Y G D M A D C C E K Q E P E  
 R N E C F L S H K D D S P D L P K L **K P** D P N T L C D E F A D E K K F W G K Y L Y E I A R R H P Y F Y A P E L L Y A  
 N K Y N G V F **Q E C** C Q A E D K G A C L L P K I E T M R E K V L A S S A R Q R L R C A S I Q K F G E R A L K A W S V A R  
 L S Q K F P K A E F V E V T K L V T D L T K V H K E C C H G D L L **E C A D D R A** D L A K Y I C D N Q D T I S S K L K E C  
**C D K P L L** E K S H C I A E V E K D A I P E N L P P L T A D F A E D K D V C K N Y Q E A K D A F L G S F L Y E Y S R R H  
 P E Y A V S V L L R L A K E Y E A T L E **E C C A K D D P H A** C Y S T V F D K L K H L V D E P Q N L I K Q N C D Q F E K L  
 G E Y G F Q N A L I V R Y T R K V P Q V S T P T L V E V S R S L G K V G T R C C T K P E S E R M P C T E D Y L S L I L N  
 R L C V L H E K T P V S E K V T K C C T E S L V N R R P C F S A L T P D E T Y V P K A F D E K L F T F H A D I C T L P D  
 T E K Q I K K Q T A L V E L L K H K P K A T E E Q L K T V M E N F V A F **V D K C** C A A D D K E A C F A V E G P K L V V S  
 T Q T A L A

**Figure S1.** Primary sequence of BSA highlighted indicating the MS identified peptides. BSA was denatured and digested in-solution by free chymotrypsin (33.1 mg/mL) using an E:S ratio of 10:1 and incubated at 37 °C for 4 hours. MS data shows 11 unique peptides with a coverage of 18 % (107/606 amino acids).

M K W V T F I S L L L L F S S A Y S R G V F R R D T H K S E I A H R F **K D L G E** E H F K G L V L I A  
**F S Q Y L Q Q C P F** D E H V K L V N E L T E F A K T C V A D E S H A G C E K S L H T L F G D E L C K  
 V A S L R E T Y G D M A D C C E K Q E P E R N E C F L S H K D D S P D L P K L K P D P N T L C D E F  
 K A D E K K F W G K Y L Y E I A R R H P Y F Y A P E L L Y Y A N K Y N G V F Q E C C Q A E D K G A C  
 L L P K I E T M R E K V L A S S A R Q R L R C A S I Q K F G E R A L K A W S V A R L S Q K F P K A E  
**F V E V T K L V T D** L T K V H K E C C H G D L L E C A D D R A D L A K Y I C D N Q D T I S S K L K E  
 C C D K P L L E K S H C I A E V E K D A I P E N L P P L T A D F A E D K D V C K N Y Q E A K D A F L  
 G S F L Y E Y S R R H P E Y A V S V L L R L A K E Y E A T L E E C C A K D D P H A C Y S T V F D K L  
**K H L V D E P Q N L** I K Q N C D Q F E K L G E Y G F Q N A L I V R Y T R K V P Q V S T P T L V E V S  
 R S L G K V G T R C C T K P E S E R M P C T E D Y L S L I L N R L C V L H E K T P V S E K V T K C C  
 T E S L V N R R P C F S A L T P D E T Y V P K A F D E K L F T F H A D I C T L P D T E K Q I K K Q T  
 A L V E L L K H K P K A T E E Q L K T V M E N F V A F **V D K** C C A A D D K E A C F A V E G P K L V V  
**S T Q T A L A**

**Figure S2.** Primary sequence of BSA with highlights indicating the MS identified peptides. FA-CT enzyme particle digestion of denatured BSA at 10:1 enzyme-to-substrate ratio (1.30mg CT:0.13mg BSA) using chymotrypsin dissolved in phosphate buffer (50mM, pH 6.4) indicates 42% coverage (256/607 amino acids), generating 54 chymotryptic peptides.

M K W V T F I S L L L L F S S A Y S R G V F R R D T H K S E I A H R F **K D L G E** E H F K G L V L I A  
**F S Q Y L Q Q C P F** D E H V K L V N E L T E F A K T C V A D E S H A G C E K S L H T L F G D E L C K  
 V A S L R E T Y G D M A D C C E K Q E P E R N E C F L S H K D D S P D L P K L K P D P N T L C D E F  
 K A D E K K F W G K Y L Y E I A R R H P Y F Y A P E L L Y Y A N K Y N G V F Q E C C Q A E D K G A C  
 L L P K I E T M R E K V L A S S A R Q R L R C A S I Q K F G E R A L K A W S V A R L S Q K F P K A E  
**F V E V T K L V T D** L T K V H K E C C H G D L L E C A D D R A D L A K Y I C D N Q D T I S S K L K E  
 C C D K P L L E K S H C I A E V E K D A I P E N L P P L T A D F A E D K D V C K N Y Q E A K D A F L  
 G S F L Y E Y S R R H P E Y A V S V L L R L A K E Y E A T L E E C C A K D D P H A C Y S T V F D K L  
**K H L V D E P Q N L** I K Q N C D Q F E K L G E Y G F Q N A L I V R Y T R K V P Q V S T P T L V E V S  
 R S L G K V G T R C C T K P E S E R M P C T E D Y L S L I L N R L C V L H E K T P V S E K V T K C C  
 T E S L V N R R P C F S A L T P D E T Y V P K A F D E K L F T F H A D I C T L P D T E K Q I K K Q T  
 A L V E L L K H K P K A T E E Q L K T V M E N F V A F **V D K** C C A A D D K E A C F A V E G P K L V V  
**S T Q T A L A**

**Figure S3.** Primary sequence of BSA with highlights indicating the MS identified peptides. FA-CT enzyme particle digestion of denatured BSA at 10:1 enzyme-to-substrate ratio (1.30mg CT:0.13mg BSA) using chymotrypsin dissolved in PBS (10mM, pH 7.4) indicates 35% coverage (214/607 amino acids), generating 54 chymotryptic peptides

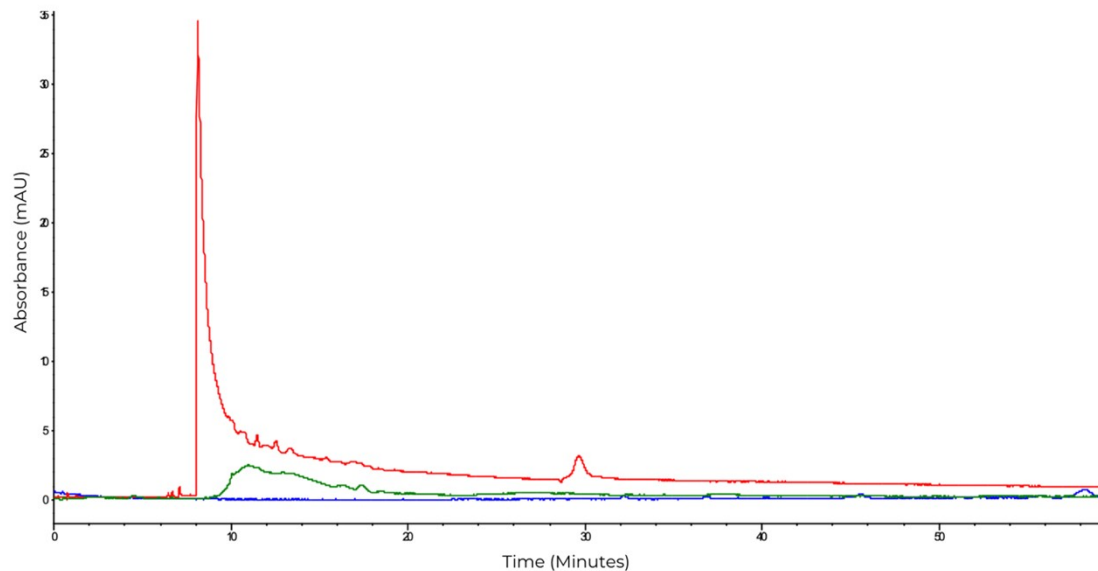

**Figure S4** – Electropherograms from the chymotrypsin 0.13 mM standard (red) and the supernatants from the FA-CT (green) and TESB-CT (blue) enzyme particles. This shows the supernatant for the TESB-CT below the limit of detection for the G7100A Capillary Electrophoresis.

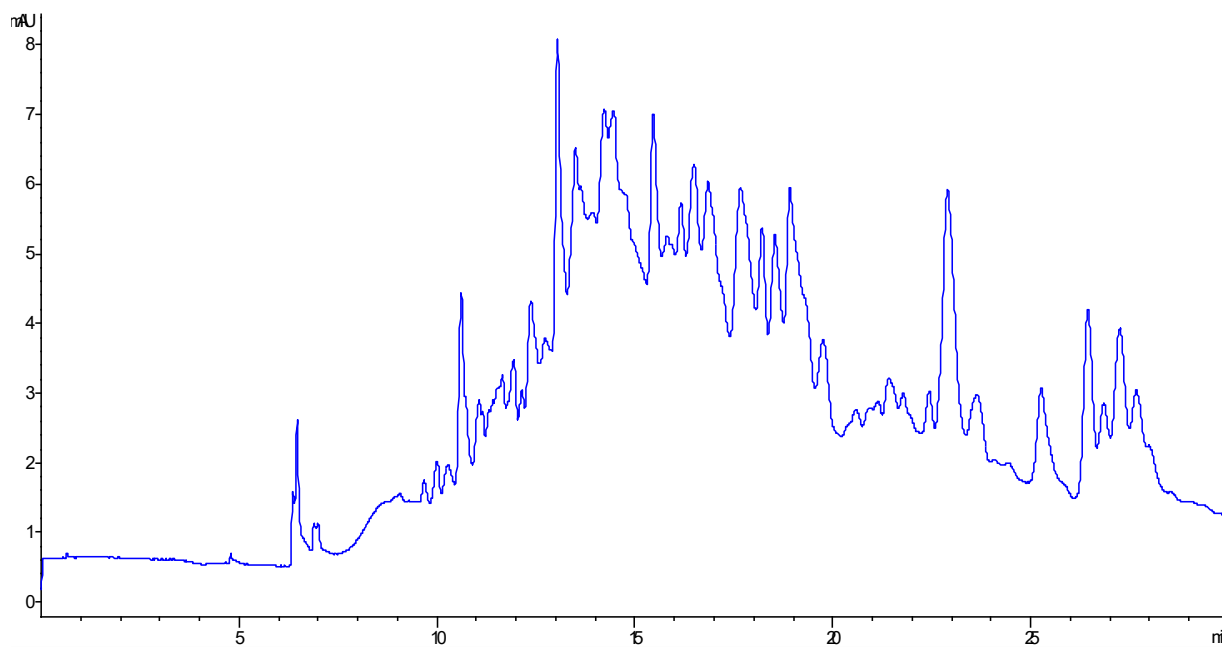

**Figure S5.** Electropherogram of FA-CT enzyme particle digestion of denatured BSA at 1:1 enzyme-to-substrate ratio (1.30mg CT:1.30mg BSA). Separations were performed at +15 kV using 50 mM phosphate buffer, pH 2.5 with detection at 200 nm.

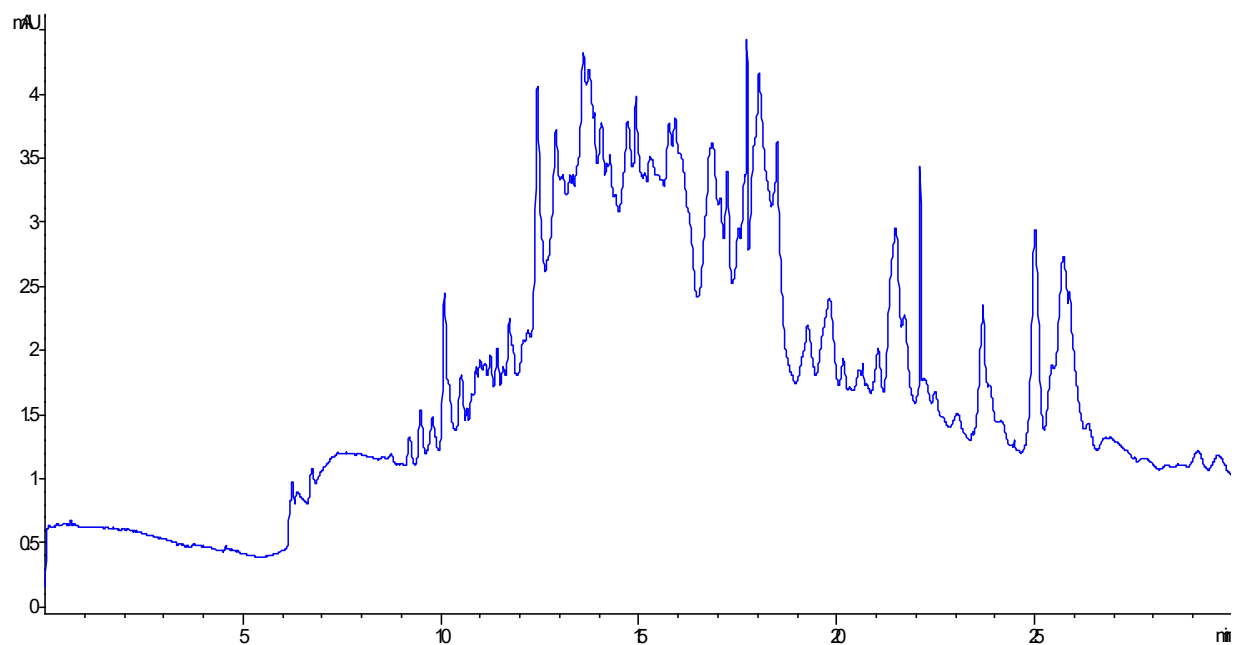

**Figure S6** – Electropherogram of FA-CT enzyme particle digestion of denatured BSA at 10:1 enzyme-to-substrate ratio (1.30mg CT:0.13mg BSA). Separation condition was the same as Fig. S1.

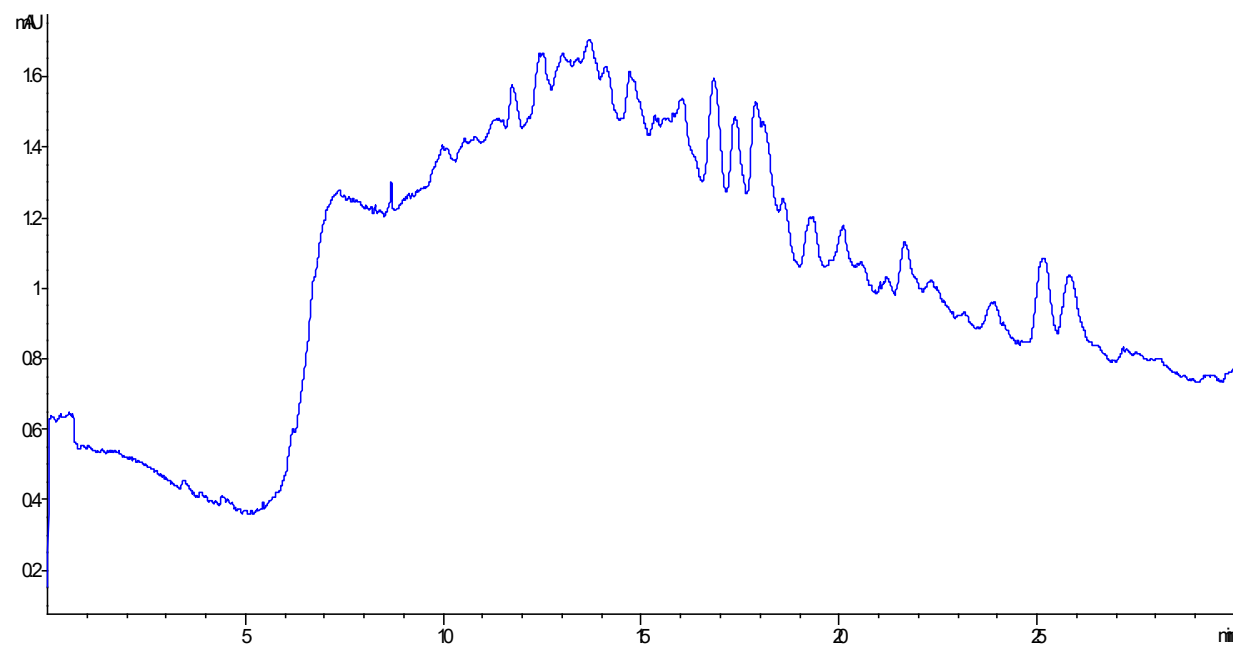

**Figure S7** – Electropherogram of FA-CT enzyme particle digestion of denatured BSA at 100:1 enzyme-to-substrate ratio (1.30mg CT:0.013mg BSA). Separation condition was the same as Fig. S1.

|            |              |             |             |             |             |
|------------|--------------|-------------|-------------|-------------|-------------|
| KWVTFISLLL | LFSSAYS SRGV | FRRDTHKSEI  | AHRFKDLGEE  | HFKGLVLIAF  | SQYLQQCPFD  |
| EHVKLVNELT | EFAKTCVADE   | SHAGCEKSLH  | TLFGDELCKV  | ASLRETYGDM  | ADCCEKQEPF  |
| RNECFLSHKD | DSPDLPKLPK   | DPNTLCDEFK  | ADEKKFWGKY  | LYEIAARRHPY | FYAPPELLYYA |
| NKYNGVFQEC | CQAEDKGACL   | LPKIETMREK  | VLAASSARQRL | RCASIQKFGE  | RALKAWSVAR  |
| LSQKFPKAEF | VEVTKLVTDL   | TKVHKECCHG  | DLLECAADDR  | DLAKYICDNQ  | DTISSKLEK   |
| CDKPLLEKSH | CIAEVEKDAI   | PENLPPPLTAD | FAEDKDVCKN  | YQEAQDAFLG  | SFLYEYSRRH  |
| PEYAVSVLLR | LAKEYEATLE   | ECCAKDDPHA  | CYSTVFDKLL  | HLVDEPQNLI  | KQNCQDFEKL  |
| GEYGFQNALI | VRYTRKVPQV   | STPTLVVEVSR | SLGKVGTRCC  | TKPESERMPC  | TEDYLSLILN  |
| RLCVLHEKTP | VSEKVTKCC    | ESLVNRRPCF  | SALTPDETYV  | PKAFDEKLF   | FHADICTLPD  |
| TEKQIKKQTA | LVELLKHKPK   | ATEEQLKTVM  | ENFVAFVDKC  | CAADDKEACF  | AVEGPKLVVS  |
| TQTALA     |              |             |             |             |             |

**Figure S8** – Primary sequence of BSA with highlights indicating the MS identified peptides. FA-CT enzyme particle digestion of denatured BSA at 1:1 enzyme-to-substrate ratio (1.30mg CT:1.30mg BSA) indicates 68% coverage (415/606 amino acids), generating 54 unique peptides.

|            |              |             |             |             |             |
|------------|--------------|-------------|-------------|-------------|-------------|
| KWVTFISLLL | LFSSAYS SRGV | FRRDTHKSEI  | AHRFKDLGEE  | HFKGLVLIAF  | SQYLQQCPFD  |
| EHVKLVNELT | EFAKTCVADE   | SHAGCEKSLH  | TLFGDELCKV  | ASLRETYGDM  | ADCCEKQEPF  |
| RNECFLSHKD | DSPDLPKLPK   | DPNTLCDEFK  | ADEKKFWGKY  | LYEIAARRHPY | FYAPPELLYYA |
| NKYNGVFQEC | CQAEDKGACL   | LPKIETMREK  | VLAASSARQRL | RCASIQKFGE  | RALKAWSVAR  |
| LSQKFPKAEF | VEVTKLVTDL   | TKVHKECCHG  | DLLECAADDR  | DLAKYICDNQ  | DTISSKLEK   |
| CDKPLLEKSH | CIAEVEKDAI   | PENLPPPLTAD | FAEDKDVCKN  | YQEAQDAFLG  | SFLYEYSRRH  |
| PEYAVSVLLR | LAKEYEATLE   | ECCAKDDPHA  | CYSTVFDKLL  | HLVDEPQNLI  | KQNCQDFEKL  |
| GEYGFQNALI | VRYTRKVPQV   | STPTLVVEVSR | SLGKVGTRCC  | TKPESERMPC  | TEDYLSLILN  |
| RLCVLHEKTP | VSEKVTKCC    | ESLVNRRPCF  | SALTPDETYV  | PKAFDEKLF   | FHADICTLPD  |
| TEKQIKKQTA | LVELLKHKPK   | ATEEQLKTVM  | ENFVAFVDKC  | CAADDKEACF  | AVEGPKLVVS  |
| TQTALA     |              |             |             |             |             |

**Figure S9.** Primary sequence of BSA with highlighted indicating the MS identified peptides. FA-CT enzyme particle digestion of denatured BSA at 10:1 enzyme-to-substrate ratio (1.3mg CT:0.13mg BSA) shows a 67% coverage (407/606 amino acids), generating 44 unique peptides.

|            |              |             |              |             |             |
|------------|--------------|-------------|--------------|-------------|-------------|
| MKWVTFISLL | LLFSSAYS SRG | VFRRDTHKSE  | IAHRFKDLGE   | EHFKGLVLIA  | FSQYLQQCPF  |
| DEHVKLVNEL | TEFAKTCVAD   | ESHAGCEKSL  | HTLFGDELCK   | VASLRETYGD  | MADCCEKQEP  |
| ERNECFLSHK | DDSPDLPKLP   | PDPNTLCDEF  | KADEKKFWGK   | YLYEIAARRHP | FYAPPELLYY  |
| ANKYNGVFQE | CCQAEDKGAC   | LLPKIETMRE  | KVLAASSARQR  | LRCASIQKFGE | ERALKAWSVA  |
| RLSQKFPKAE | FVEVTKLVTD   | LTKVHKECC   | GDLLLECAADDR | ADLAKYICDN  | QDTISSKLEK  |
| CCDKPLLEKS | HCIAEVEKDA   | IPENLPPPLTA | DFAEDKDVCK   | NYQEAQDAFL  | GSFLYEYSRR  |
| HPEYAVSVLL | RLAKEYEATL   | EECCAADDPH  | ACYSTVFDKL   | KHLVDEPQNLI | IKQNCQDFEKL |
| LGEYGFQNAL | IVRYTRKVPQ   | VSTPTLVVEVS | RSLGKVGTRC   | CTKPESERMPC | CTEDYLSLIL  |
| NRLCVLHEKT | PVSEKVTKCC   | TESLVNRRPC  | FSALTPDETY   | VPKAFDEKLF  | TFHADICTLP  |
| DTEKQIKKQT | ALVELLKHKP   | KATEEQLKT   | MENFVAFVDK   | CCAADDKEAC  | FAVEGPKLVV  |
| STQTALA    |              |             |              |             |             |

**Figure S10** – Primary sequence of BSA with highlights indicating the MS identified peptides. FA-CT enzyme particle digestion of denatured BSA at 100:1 enzyme-to-substrate ratio (1.30mg CT:0.013mg BSA) shows a 66% coverage (400/607 amino acids), generating 29 unique peptides.

|            |              |             |              |             |             |
|------------|--------------|-------------|--------------|-------------|-------------|
| MKWVTFISLL | LLFSSAYS SRG | VFRRDTHKSE  | IAHRFKDLGE   | EHFKGLVLIA  | FSQYLQQCPF  |
| DEHVKLVNEL | TEFAKTCVAD   | ESHAGCEKSL  | HTLFGDELCK   | VASLRETYGD  | MADCCEKQEP  |
| ERNECFLSHK | DDSPDLPKLP   | PDPNTLCDEF  | KADEKKFWGK   | YLYEIAARRHP | FYAPPELLYY  |
| ANKYNGVFQE | CCQAEDKGAC   | LLPKIETMRE  | KVLAASSARQR  | LRCASIQKFGE | ERALKAWSVA  |
| RLSQKFPKAE | FVEVTKLVTD   | LTKVHKECC   | GDLLLECAADDR | ADLAKYICDN  | QDTISSKLEK  |
| CCDKPLLEKS | HCIAEVEKDA   | IPENLPPPLTA | DFAEDKDVCK   | NYQEAQDAFL  | GSFLYEYSRR  |
| HPEYAVSVLL | RLAKEYEATL   | EECCAADDPH  | ACYSTVFDKL   | KHLVDEPQNLI | IKQNCQDFEKL |
| LGEYGFQNAL | IVRYTRKVPQ   | VSTPTLVVEVS | RSLGKVGTRC   | CTKPESERMPC | CTEDYLSLIL  |
| NRLCVLHEKT | PVSEKVTKCC   | TESLVNRRPC  | FSALTPDETY   | VPKAFDEKLF  | TFHADICTLP  |
| DTEKQIKKQT | ALVELLKHKP   | KATEEQLKT   | MENFVAFVDK   | CCAADDKEAC  | FAVEGPKLVV  |
| STQTALA    |              |             |              |             |             |

**Figure S11** - Primary sequence of BSA with highlights indicating the MS identified peptides. TESB-CT enzyme particle digestion of denatured BSA at 1:1 enzyme-to-substrate ratio (1.30mg CT:1.30mg BSA) shows a 55% coverage (334/607 amino acids) generating 26 chymotryptic peptides.

|            |            |            |             |            |
|------------|------------|------------|-------------|------------|
| CGVPAIQPVL | SGLSRIVNGE | EAVPGSWPWQ | VSLQDKTG FH | FCGGSLINEN |
| WVVTAAHCGV | TTSDVVVAGE | FDQGSSSEKI | QKLKIAKVFK  | NSKYNSLTIN |
| NDITLLKLST | AASFSTVSA  | VCLPSASDDF | AAGTTCVTTG  | WGLTRYTNAN |
| TPDRLQQASL | PLLSNTNCKK | YWGTKIKDAM | ICAGASGVSS  | CMGDSGGPLV |
| CKKNGAWTLV | GIVSWGSSCT | STSTPGVYAR | VTALVNWVQQ  | TLAN       |

**Figure S12** - Primary sequence of chymotrypsin with highlights indicating the MS identified peptides. TESB-CT autolysis shows a 67% coverage (164/245 amino acids) generating 14 chymotryptic peptides.
